# Supplementary material
Source: MDPI journal article supplement (https://www.mdpi.com/2072-4292/16/2/219)
Supplement: s1 [file s1]

## Supplementary Materials

**Table S1** Description of validation points

| No.  | Longitude(°E) | Latitude(°N) | Validation | Description                                                                                  |
|------|---------------|--------------|------------|----------------------------------------------------------------------------------------------|
| VP1  | 106.60        | 29.69        | 1          | Baotong Road, Yubei District                                                                 |
| VP2  | 106.48        | 29.53        | 1          | Chenjiaping Interchange, Jiulongpo District                                                  |
| VP3  | 106.47        | 29.48        | 1          | Chaoyangsi Interchange, Dadukou District<br>Southwest of the intersection of G319 and Tian   |
| VP4  | 106.45        | 29.55        | 1          | Chen Road, Shapingba District                                                                |
| VP5  | 106.45        | 29.54        | 1          | Fengtian Road, Shapingba District                                                            |
| VP6  | 106.48        | 29.53        | 1          | Chenjiaping Interchange, Jiulongpo District                                                  |
| VP7  | 106.51        | 29.65        | 0          | Kunlun Hospice, Yubei District                                                               |
| VP8  | 106.57        | 29.50        | 1          | Xuefu Avenue, Na'nan District                                                                |
| VP9  | 106.47        | 29.56        | 1          | Hanyu Road, Shapingba District                                                               |
| VP10 | 106.60        | 29.65        | 1          | Shangwan Road, Yubei District                                                                |
| VP11 | 106.46        | 29.52        | 1          | Orchid 5, Jiulongpo District<br>Rubber Gate under the Bai Ma Cai flyover,                    |
| VP12 | 106.47        | 29.53        | 1          | Jiulongpo District                                                                           |
| VP13 | 106.49        | 29.53        | 1          | Keyuan Sanjie, Jiulongpo District                                                            |
| VP14 | 106.49        | 29.50        | 1          | Shuimian Interchange, Jiulongpo District                                                     |
| VP15 | 106.51        | 29.50        | 1          | Taohuaxi Bridge, Jiulongpo District                                                          |
| VP16 | 106.56        | 29.48        | 1          | Yunan Diversion Road, Ba'nan District                                                        |
| VP17 | 106.51        | 29.53        | 1          | Yuanjia Road, Jiulongpo District                                                             |
| VP18 | 106.52        | 29.39        | 1          | Ba Xian Avenue, Ba'nan District                                                              |
| VP19 | 106.64        | 29.25        | 0          | Xinya Village, Ba'nan District                                                               |
| VP20 | 106.57        | 29.57        | 1          | Grand Theatre [Subway Station], Jiangbei District                                            |
| VP21 | 106.32        | 29.51        | 1          | Gao Xin Avenue, Jiulongpo District                                                           |
| VP22 | 106.54        | 29.46        | 1          | Hongguang Avenue, Ba'nan District                                                            |
| VP23 | 106.60        | 29.68        | 1          | Huixing Interchange, Yubei District                                                          |
| VP24 | 106.57        | 29.54        | 1          | Nanbin Road, Na'nan District                                                                 |
| VP25 | 106.56        | 29.73        | 1          | Tongmao Bridge, Yubei District                                                               |
| VP26 | 106.50        | 29.62        | 1          | Starlight Avenue, Yubei District                                                             |
| VP27 | 106.54        | 29.56        | 1          | Niujiaotuo Interchange, Yuzhong District<br>No.9, Building 26, Xiyong II Resettlement House, |
| VP28 | 106.37        | 29.58        | 1          | Shapingba District                                                                           |
| VP29 | 106.42        | 29.82        | 1          | No.216 Tiansheng Road, Beibei District                                                       |

### Supplementary—Sensitivity analysis of hydraulic conductivity

Two metrics (i.e., Fit statistic (F) and Root Mean Square Deviation (RMSD)) were used to quantify the degree of matching and variation between model predictions respectively. In each case, the Ks = 0.001 simulation was used as the reference and both measures are calculated against this reference. F is widely used for evaluating the goodness of agreement between predicted flood extent and the reference [1]. It varies between 1 for a perfect fit and 0

when no overlap exists. It can be calculated as follows:

$$F = \frac{A_0}{A_r + A_s - A_0} \quad (1)$$

where  $A_r$  is the referenced wet areas,  $A_s$  is the predicted wet areas, and  $A_0$  is the overlap of  $A_r$  and  $A_s$ .

The RMSD is particularly suitable for evaluating the overall agreement/discrepancy of water depth between two paired results on a cell-by-cell basis [1]. It can be defined as follows:

$$RMSD = \sqrt{\frac{\sum_{i=0}^n (d_i^s - d_i^r)^2}{n}} \quad (2)$$

where  $d_i^s$  and  $d_i^r$  are the predicted and referenced water depths respectively,  $i$  is the index of the wet cells and  $n$  is the total number of wet cells in the prediction and observation.

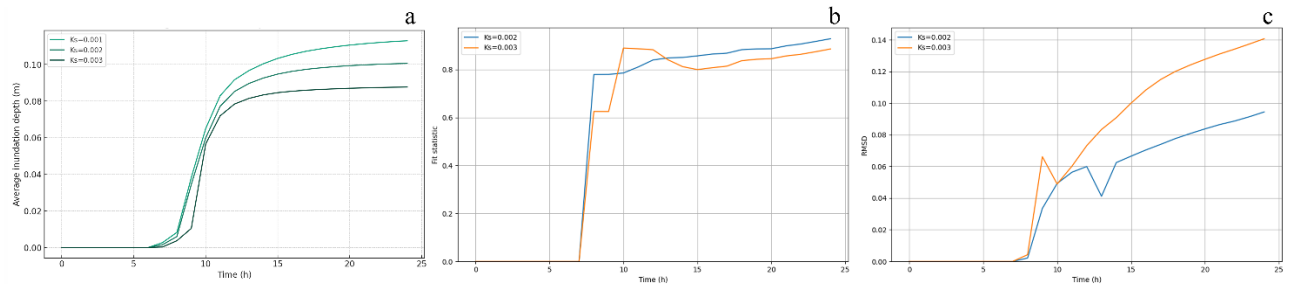

**Figure S1.** Sensitivity analysis of hydraulic conductivity.

The model was found to be very sensitive to the specification of hydraulic conductivity (Figure S1) and a small variation of this parameter results in a notable change in the depth of inundation (Figure S1a). The simulation with a Ks value of 0.001 is used as the reference simulation and RMSE and F are calculated over time. RMSE and F statistic (Figure S1b and c) also demonstrate the spatiotemporal variation of model predictions. Model calibration shows that the model is highly sensitive to soil hydraulic conductivity (Ks). With a 0.001 m/h decrease of Ks, an average increase of 0.126 m of inundated depth is predicted. This is due to the amount of reduced infiltration associated with a smaller hydraulic conductivity value. This observation reveals that flood inundation is highly uncertain in the rapidly developing area, particularly for long-term predictions.

#### Reference:

1. Yu, D.; Coulthard, T.J. Evaluating the importance of catchment hydrological parameters for urban surface water flood modelling using a simple hydro-inundation model. *J. Hydrol.* 2015, 524, 385-400, doi:<https://doi.org/10.1016/j.jhydrol.2015.02.040>.
